# Supplementary material for: Multi-Criteria Evaluation Model of Management for Weaned Piglets and Its Relations with Farm Performance and Veterinary Medicine Consumption
Source: MDPI journal article supplement (doi:10.3390/ani13223508), 2023-11-14
Supplement: s1 [file s1]

## Supplementary Material – Table S1.

**Table S1.** Scores of each index and their associated management factors in the quick scan handling and hygiene calculator

| ID FARM:                                                                               | Please. complete with<br>yes or no | Score     | Notes    |
|----------------------------------------------------------------------------------------|------------------------------------|-----------|----------|
| <b>1. Pre-weaning or lactation handling:</b>                                           |                                    | <b>10</b> |          |
| Handling practices to ensure adequate piglet colostrum intake                          | yes                                | 2.5       |          |
| Age of piglets at weaning:                                                             | -                                  |           |          |
| ≤ 22 days                                                                              | no                                 | 0         |          |
| 22-24 days                                                                             | no                                 | 1.25      | Only one |
| ≥ 25 days                                                                              | yes                                | 2.5       |          |
| Early water and feed intake during lactation:                                          | -                                  |           |          |
| Properly cleaned and suitable feeders for piglets                                      | yes                                | 0.833     |          |
| Feeding small amounts of prestarter feed multiple times a day to encourage consumption | yes                                | 0.833     |          |
| Suitable drinkers for piglets                                                          | yes                                | 0.833     |          |
| Viability of weaned piglets to have a good performance at the post-weaning phase       | yes                                | 2.5       |          |
| <b>2. Batch Management:</b>                                                            |                                    | <b>10</b> |          |
| Homogeneous batches (same number of farrowings/week = ±5%)                             | yes                                | 2.5       |          |
| Careful attention to smaller piglets                                                   | yes                                | 2.5       |          |
| Piglets are segregated by weight into different pens                                   | yes                                | 2.5       |          |
| All-in/all-out system                                                                  | yes                                | 2.5       |          |
| <b>3. Biosecurity:</b>                                                                 |                                    | <b>10</b> |          |
| Foot-baths at weaning rooms entrance or boot change                                    | yes                                | 1.25      |          |
| Quarantine for external replacements                                                   | yes                                | 1.25      |          |
| Independent isolation pen or sickbay with special conditions for sick animals          | yes                                | 1.25      |          |
| Proper cleaning, disinfection and sanitary break between different batches             | yes                                | 1.25      |          |
| Independent slurry pit for each post-weaning room                                      | yes                                | 1.25      |          |
| Change of clothing and boots for visitors                                              | yes                                | 1.25      |          |
| The distance to other farms or roads is greater than 2 km                              | yes                                | 1.25      |          |
| Adequate rodent control program                                                        | yes                                | 1.25      |          |

|                                                                                                                                                                                                                                                                                                                                                                                                                                                                                     |     |      |          |
|-------------------------------------------------------------------------------------------------------------------------------------------------------------------------------------------------------------------------------------------------------------------------------------------------------------------------------------------------------------------------------------------------------------------------------------------------------------------------------------|-----|------|----------|
| 4. Water Quality and Access (water management):<br><br>Adequate water flow (drinkers: minimum 1l/min)<br>Chlorinated water or water with potabilization treatment.<br>Periodic pipe cleaning (biofilm removal)<br>Cleaning water tanks as part of the all-in all-out process in each post-weaning department or room<br>Annual microbiological water analysis<br>Acidification of water in the first days of post-weaning<br>Correct number of drinkers (≥1 drinker per 10 piglets) | 10  |      |          |
|                                                                                                                                                                                                                                                                                                                                                                                                                                                                                     | yes | 1.4  |          |
| 5. Feed management:<br><br>Morning weaning to reduce piglet stress and facilitate feed intake in the first hours<br>Adequate feeders for early feed intake after weaning (for instance, plate feeders)<br>Appropriate feeders design and space per pig<br>Gruel feeding at weaning (to create a liquid feed)<br>Rehydrating sources for piglets at weaning                                                                                                                          | 10  |      |          |
|                                                                                                                                                                                                                                                                                                                                                                                                                                                                                     | yes | 2    |          |
| 6. Health Program:<br><br>Swine dysentery negative<br>PRRS status of breeding sows’ herd<br>PRRS negative<br>PRRS positive with piglet vaccination<br>Monitoring and control of causes of death<br>Adequate adaptation program for gilts<br>Piglet vaccination against Mycoplasma<br>Piglet vaccination against Circovirus                                                                                                                                                          | 10  |      |          |
|                                                                                                                                                                                                                                                                                                                                                                                                                                                                                     | yes | 1    |          |
|                                                                                                                                                                                                                                                                                                                                                                                                                                                                                     | -   |      |          |
|                                                                                                                                                                                                                                                                                                                                                                                                                                                                                     | yes | 2    | Only one |
|                                                                                                                                                                                                                                                                                                                                                                                                                                                                                     | no  | 0.5  |          |
|                                                                                                                                                                                                                                                                                                                                                                                                                                                                                     | yes | 1    |          |
|                                                                                                                                                                                                                                                                                                                                                                                                                                                                                     | yes | 3    |          |
|                                                                                                                                                                                                                                                                                                                                                                                                                                                                                     | yes | 1.5  |          |
|                                                                                                                                                                                                                                                                                                                                                                                                                                                                                     | yes | 1.5  |          |
| 7. Farm stockmen training:<br><br>Clear instructions and objectives are provided<br>There is a performance-based incentive policy<br>Periodic training activities are conducted<br>The stockmen regularly receive information of weaning results and assess these                                                                                                                                                                                                                   | 10  |      |          |
|                                                                                                                                                                                                                                                                                                                                                                                                                                                                                     | yes | 3.33 |          |
|                                                                                                                                                                                                                                                                                                                                                                                                                                                                                     | yes | 1.67 |          |
|                                                                                                                                                                                                                                                                                                                                                                                                                                                                                     | yes | 1.67 |          |
|                                                                                                                                                                                                                                                                                                                                                                                                                                                                                     | yes | 3.33 |          |
| 8. Post-weaning rooms temperature management:<br><br>Adequate thermal insulation<br>Type of heating systems                                                                                                                                                                                                                                                                                                                                                                         | 10  |      |          |
|                                                                                                                                                                                                                                                                                                                                                                                                                                                                                     | yes | 1.67 |          |
|                                                                                                                                                                                                                                                                                                                                                                                                                                                                                     | -   |      |          |

|                                                                                   |     |            |          |
|-----------------------------------------------------------------------------------|-----|------------|----------|
| Localized heating (heats the area occupied by the animal: thermal floor or plate) | yes | 1.67       |          |
| Ambient heating (heats the volume of the room: convection or thermal radiation)   | yes | 1.67       |          |
| There are temperature regulators and records                                      | -   |            |          |
| Temperature regulators are available                                              | yes | 1.67       |          |
| Temperature records exist                                                         | yes | 1.67       |          |
| Temperature programming is implemented                                            | yes | 1.67       |          |
| <b>9. Post-weaning rooms ventilation management:</b>                              |     | <b>10</b>  |          |
| Type of ventilation                                                               | -   |            |          |
| Natural ventilation                                                               | yes | 1          |          |
| Forced ventilation                                                                | yes | 2          |          |
| Ventilation control system exists                                                 | yes | 2          |          |
| Minimum (5-10%) ventilation of air is ensured or programmed                       | yes | 3          |          |
| Homogeneous air distribution exists                                               | yes | 2          |          |
| <b>10. Floor type and density in post-weaning rooms:</b>                          |     | <b>10</b>  |          |
| Percentage of slats surface and bedding                                           | -   |            |          |
| Surface ≥50% slats                                                                | yes | 1.25       |          |
| Surface <50% slats without bedding                                                | yes | 0          |          |
| Surface <50% slats with bedding                                                   | yes | 1.25       |          |
| Material of slat floor                                                            | -   |            |          |
| Plastic slat floor                                                                | yes | 1.25       |          |
| Concrete slat floor                                                               | no  | 0          | Only one |
| Metal slat floor                                                                  | no  | 0.625      |          |
| Correct densities (≥0.1 m <sup>2</sup> /10 kg live weight)                        | yes | 5          |          |
| There is an available area of solid floor without roughness                       | yes | 1.25       |          |
| <b>Maximum overall score for the quick scan handling and hygiene calculator</b>   |     | <b>100</b> |          |
